# Supplementary material for: Overproduction and easy recovery of target gene products from cyanobacteria, photosynthesizing microorganisms
Source: PubMed Central journal article supplement (PMC3396340; doi:10.1007/s00253-012-3989-0), 2012-03-31
Supplement: 253_2012_3989_MOESM1_ESM.pdf [file 253_2012_3989_MOESM1_ESM.pdf]

**MS title:** Overproduction and easy recovery of target gene products from cyanobacteria, photosynthesizing microorganisms

**Journal:** Applied Microbiology and Biotechnology

**Author's name:** Munehiko ASAYAMA

**Affiliations:** *Laboratory of Molecular Genetics, College of Agriculture, Ibaraki University, Ami, Inashiki, Ibaraki 300-0393, Japan*

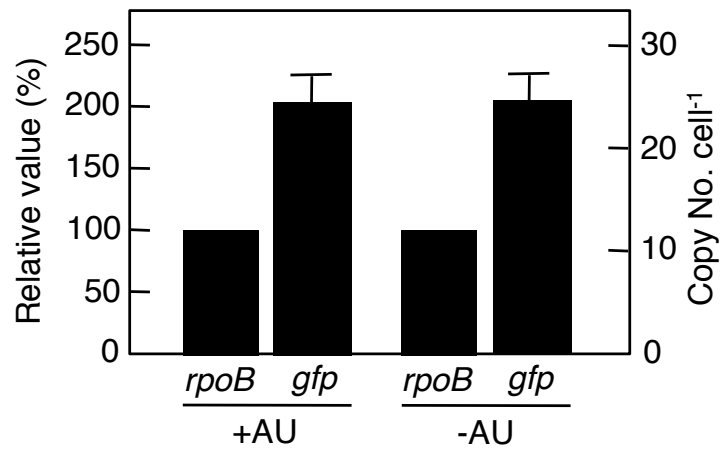

**Fig. S1** Q-PCR for analysis of copy number of expression vectors in the PCC 6803 transconjugants. Quantitative real-time PCR was done in a 30- $\mu$ l reaction solution containing 1  $\mu$ l of total DNA (prepared from the transconjugants: +AU = 6803\_GFP500, -AU = 6803\_GFP461c; see Table 1 of main manuscript), 20 pmol of the primers (6803rpoB-QF and 6803rpoB-QR for the *rpoB* gene in the genome, GFP-F and GFP-QRT for the *gfp* gene in the expression vector), and 15  $\mu$ l of substrate mixture. The abundance of the PCR products was measured and presented as relative values (%) with standard deviation in triplicate experiments. Copy numbers are also shown and based on 100% of the value for the *rpoB* gene which exists as one copy in PCC 6803 genomic DNA (12 copies of genomic DNA per cell, see text of main manuscript).
